# Supplementary material for: Corannulene-based donor–acceptor-type conjugated polymers with electrochromic properties
Source: Royal Society of Chemistry journal article supplement (doi:10.1039/d1tc01420j), 2021-01-01

## Supporting Information

---

### **Corannulene-Based Donor-Acceptor-Type Conjugated Polymers with Electrochromic Properties**

Jing-Ju Huang,<sup>‡</sup> Hsing-An Lin,<sup>‡,\*</sup> Chi Chen, Po-Wen Tang, and  
Shyh-Chyang Luo\*

Prof. H.-A. Lin,  
School of Materials Science and Engineering  
Shanghai University  
99 Shangda Road, Baoshan, Shanghai 200444  
E-mail: [halin@shu.edu.cn](mailto:halin@shu.edu.cn)

J.-J. Huang, Prof. S.-C. Luo  
Department of Materials Science and Engineering  
National Taiwan University  
No.1, Sec. 4, Roosevelt Road, Taipei 10617  
E-mail: [shyhchyang@ntu.edu.tw](mailto:shyhchyang@ntu.edu.tw)

Dr. P.-W. Tang, Dr. C. Chen  
Research Center for Applied Science  
Academic Sinica  
128 Sec. 2, Academia Rd., Nankang, Taipei, 115

Prof. Shyh-Chyang Luo  
Advanced Research Center for Green Materials Science and Technology, National  
Taiwan University, Taipei, 10617

<sup>‡</sup> Jing-Ju Huang and Hsing-An Lin contributed equally to this work.

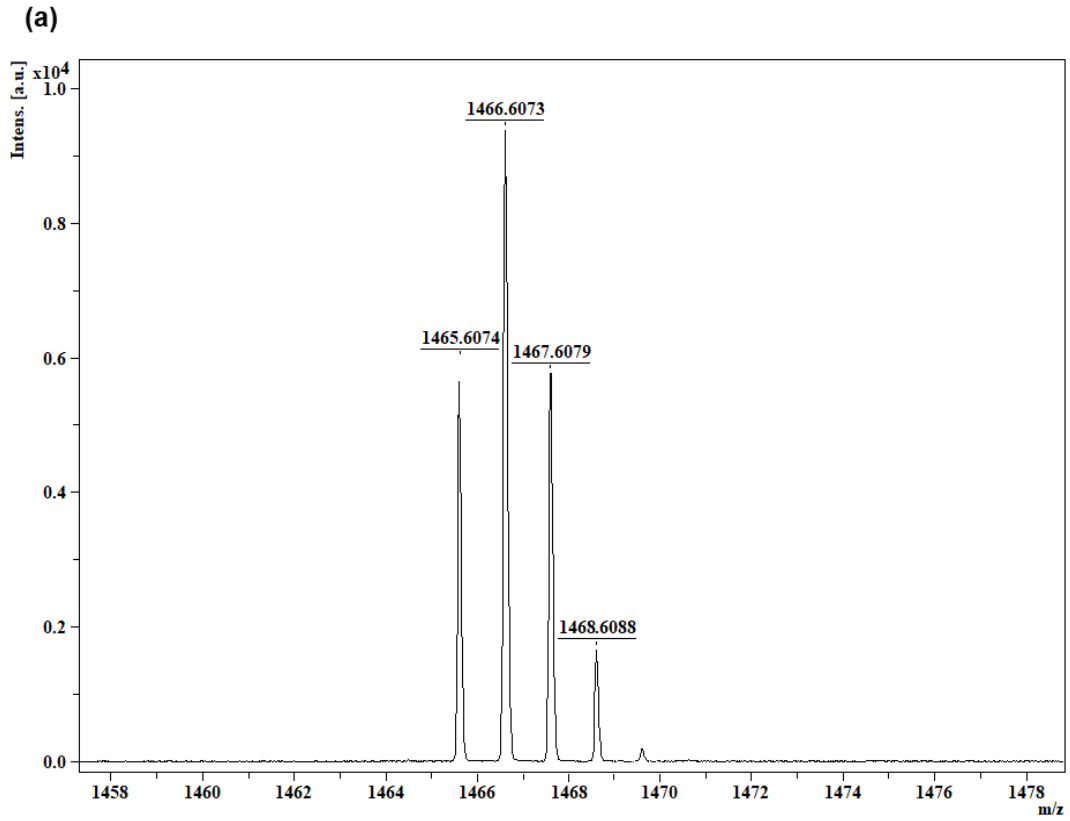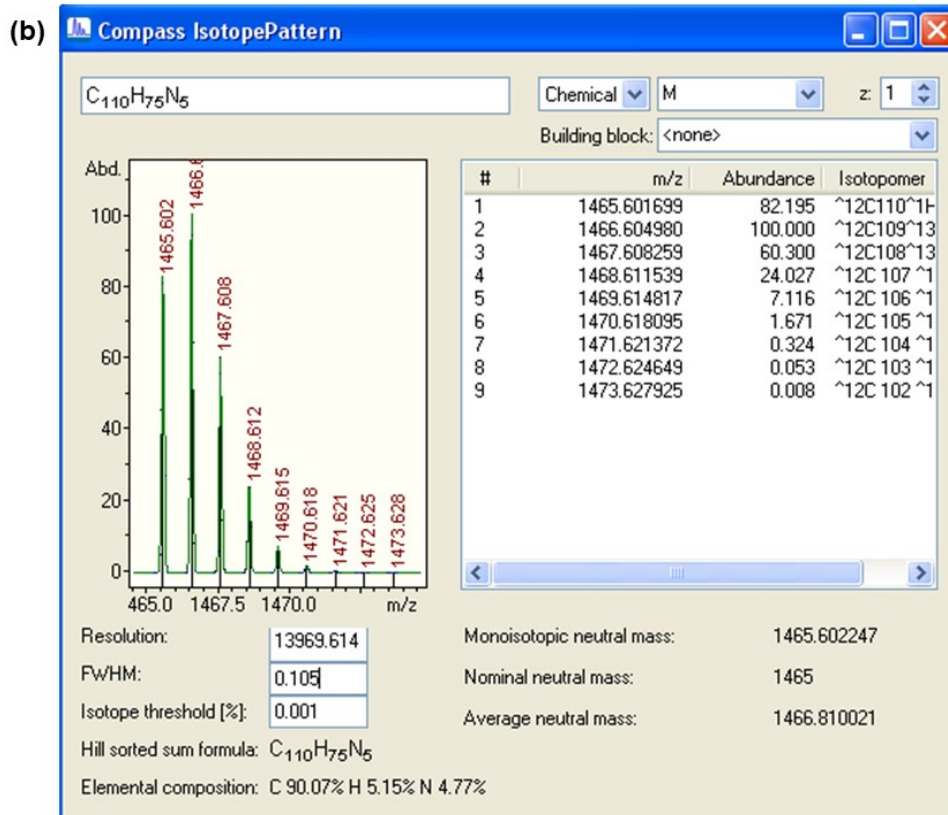

Fig. S1 MALDI-TOF mass spectrum of CT. (a) Observed. (b) Simulated.

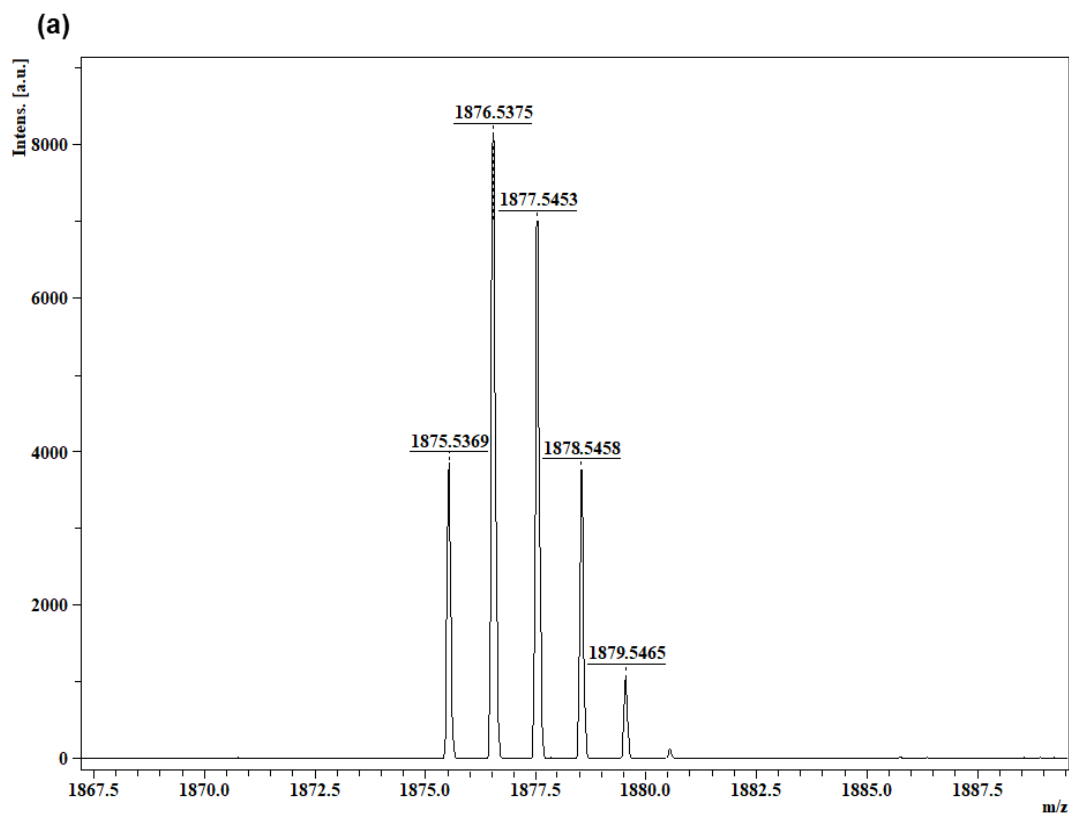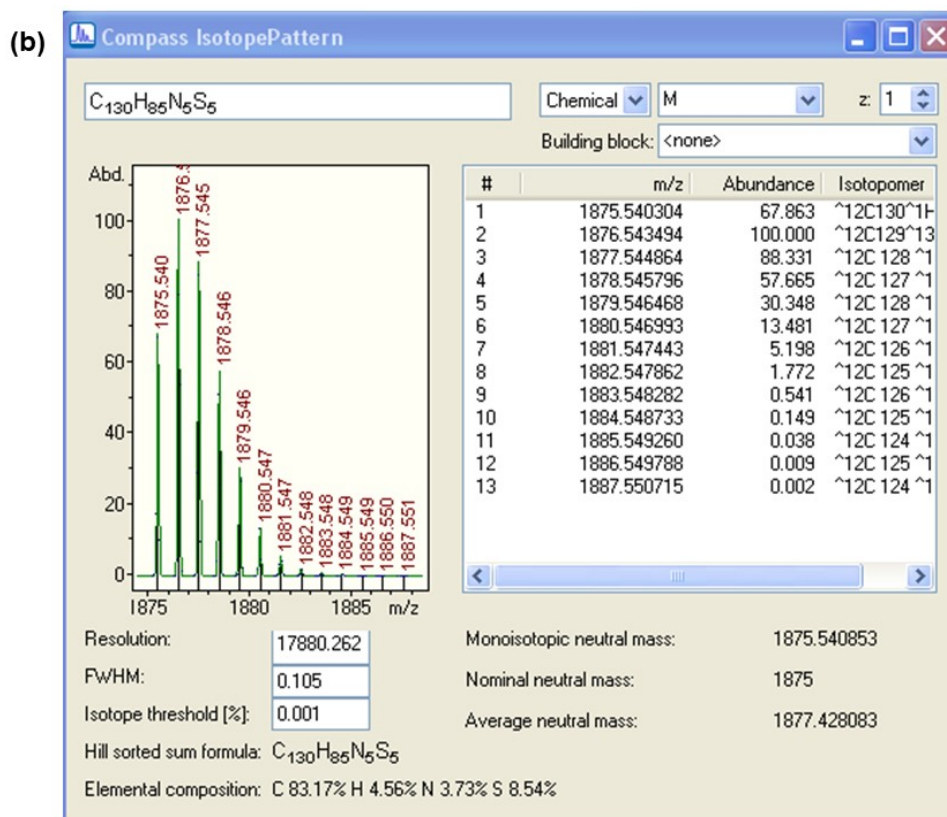

Fig. S2 MALDI-TOF mass spectrum of CTT. (a) Observed. (b) Simulated.

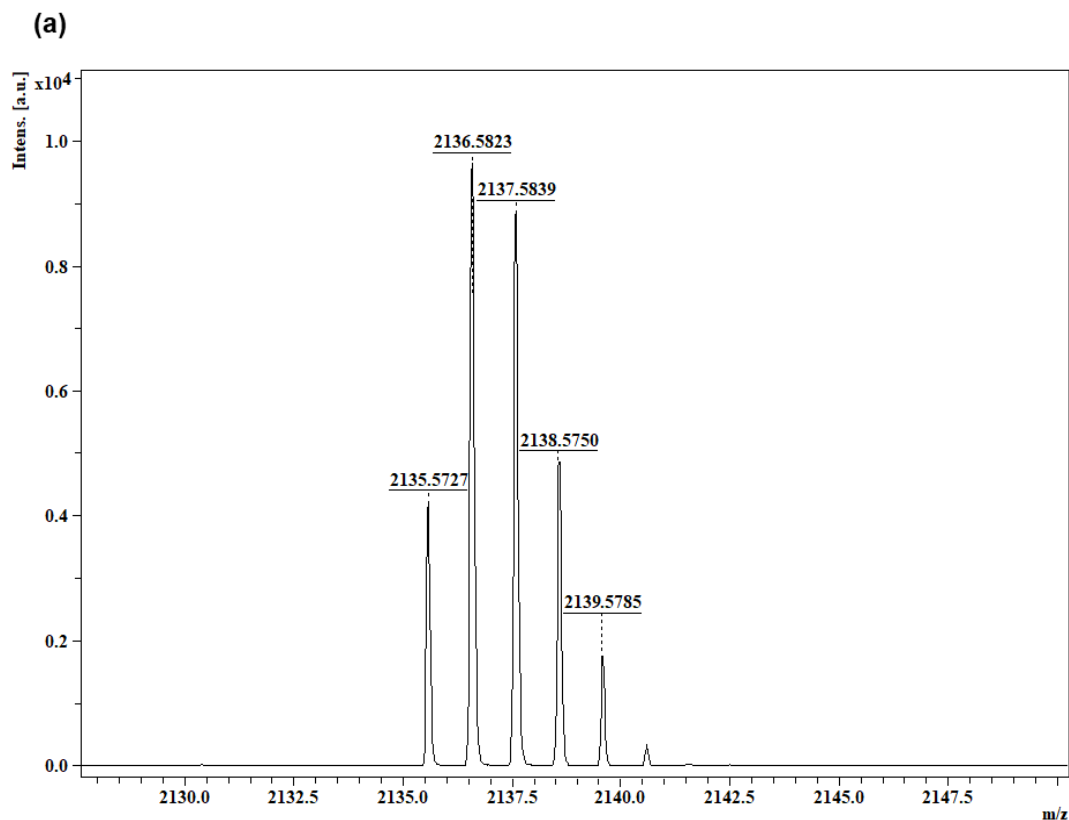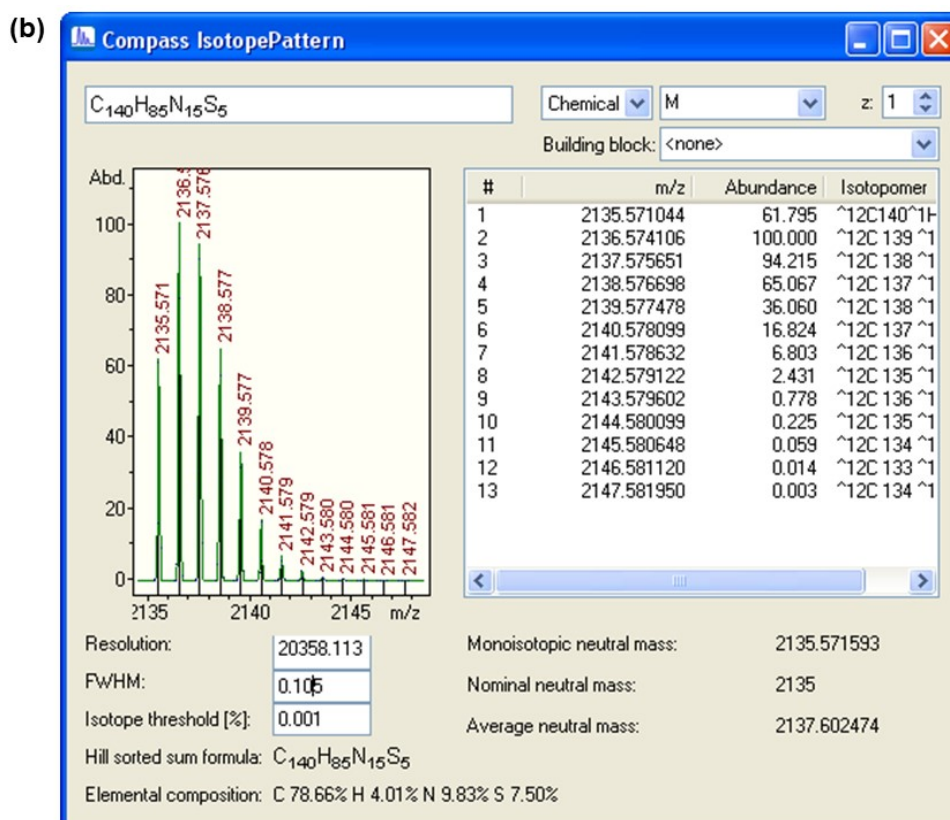

Fig. S3 MALDI-TOF mass spectrum of CBT. (a) Observed. (b) Simulated.

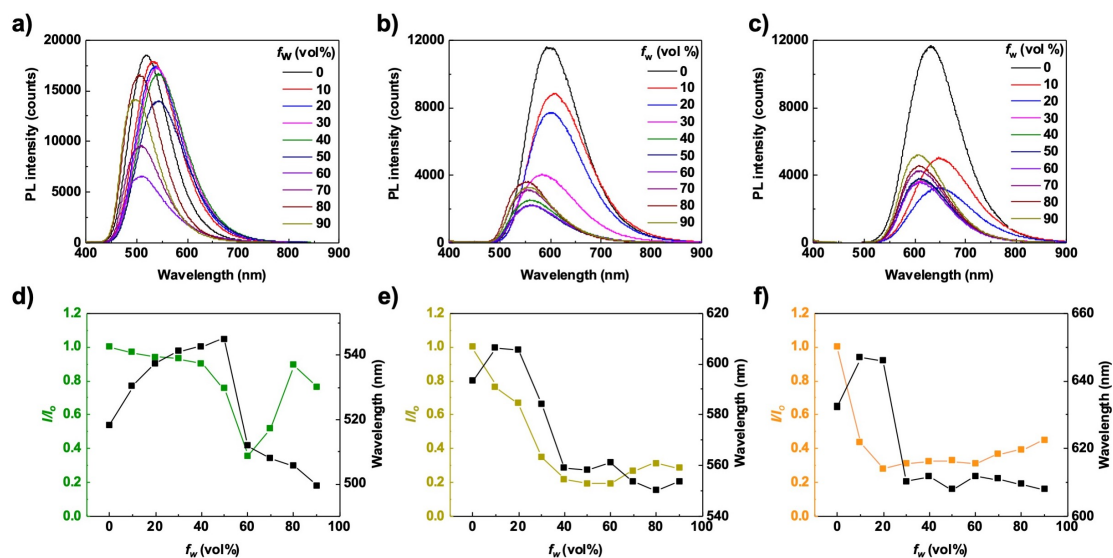

**Fig. S4** Fluorescence spectra of (a) CT, (b) CTT, (c) CBT in THF/water mixture with different water fraction ( $f_w$ ). Variation in fluorescent intensity ( $I/I_0$ ) of (d) CT, (e) CTT, (f) CBT with different  $f_w$  where  $I$  and  $I_0$  were the maximum fluorescent intensity. ( $[CT]$ ,  $[CTT]$ , or  $[CBT] = 1 \times 10^{-6}$  M;  $\lambda_{ex}$ : 365 nm for all monomers).

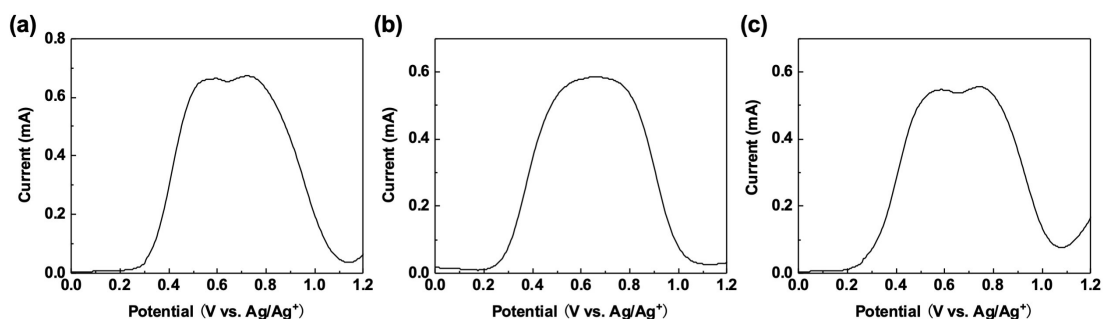

**Fig. S5** Differential pulse voltammetry of (a) PCT, (b) PCTT, and (c) PCBT polymer films upon scanning at an amplitude of 0.05 V and pulse of 0.03 s.

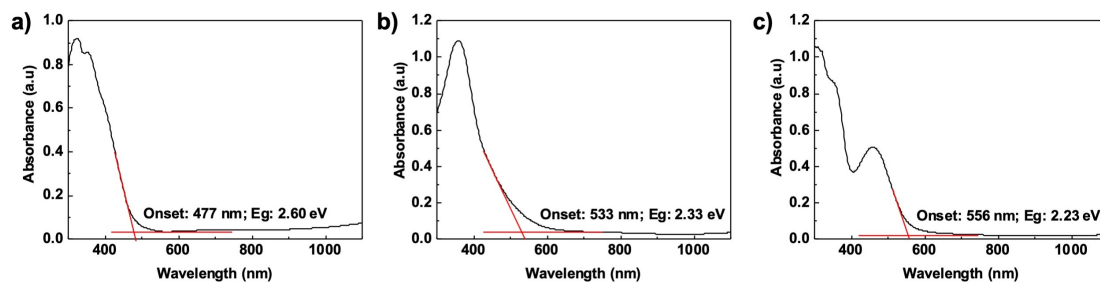

**Fig. S6** UV-vis spectra of (a) PCT, (b) PCTT, and (c) PCBT films.

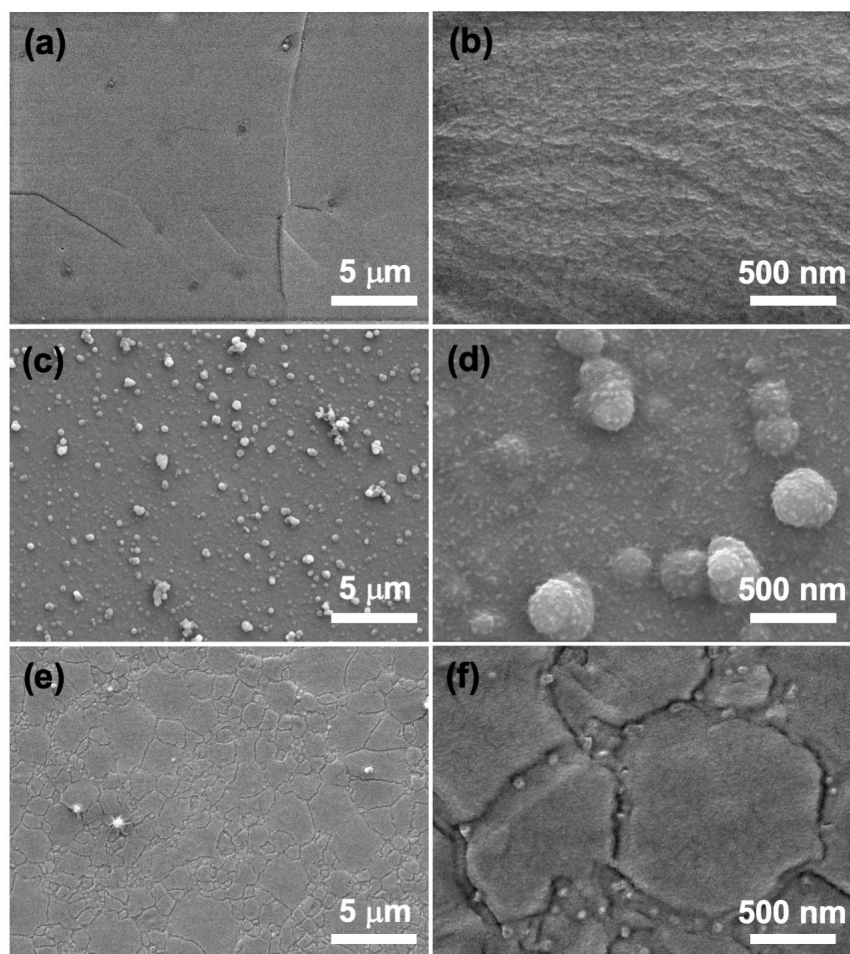

**Fig. S7** Surface morphology of (a, b) PCT, (c, d) PCTT, and (e, f) PCBT polymer films.

The images were captured using a scanning electron microscope.

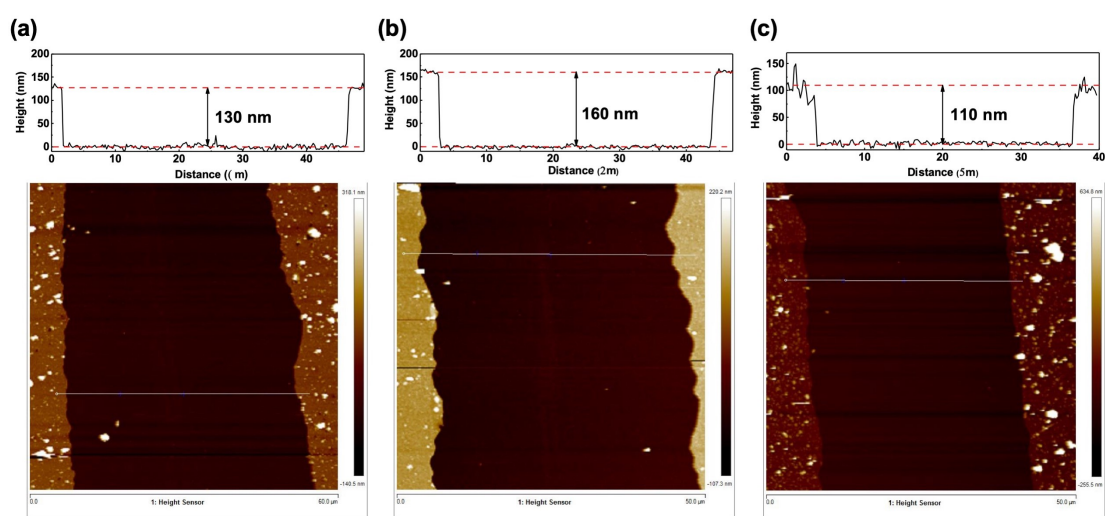

**Fig. S8** Thickness of (a) PCT, (b) PCTT, and (c) PCBT films measured by atomic force microscopy.

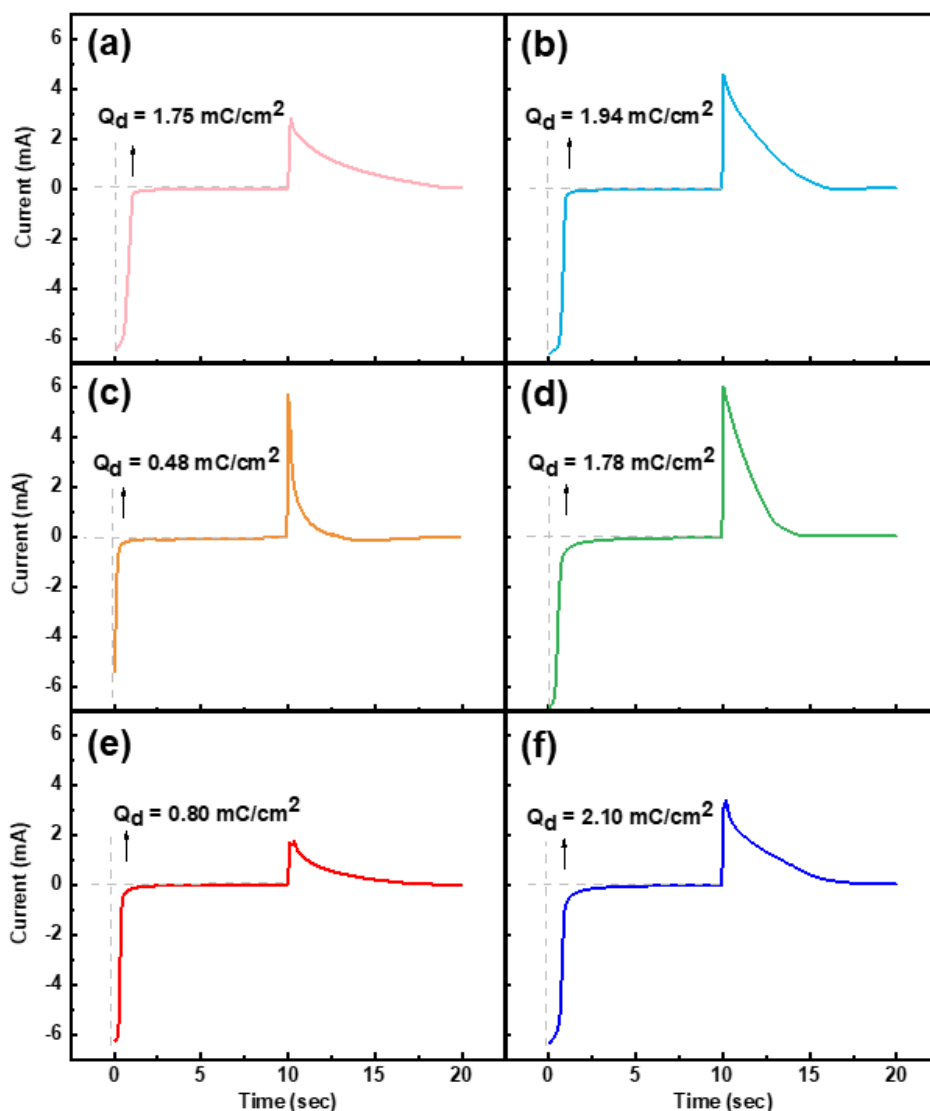

**Fig. S9** Switching current of (a,b) **PCT**, (c,d) **PCTT**, (e,f) **PCBT** films in PC solution with 100 mM TBAP as supporting electrolyte and Ag/AgCl as reference electrode: (a) the switching current of **PCT** film monitored at 350 nm as applied the potential between 0 V and 0.92 V; (b) the switching current of **PCT** film monitored at 800 nm as applied the potential between 0 V and 1.10 V; (c) the switching current of **PCTT** film monitored at 360 nm as applied the potential between 0 V and 0.95 V; (d) the switching current of **PCTT** film monitored at 750 nm as applied the potential between 0 V and 1.14 V; (e) the switching current of **PCBT** film monitored at 350 nm as applied the potential between 0 V and 0.92 V; (f) the switching current of **PCBT**

film monitored at 840 nm as applied the potential between 0 V and 1.10 V.

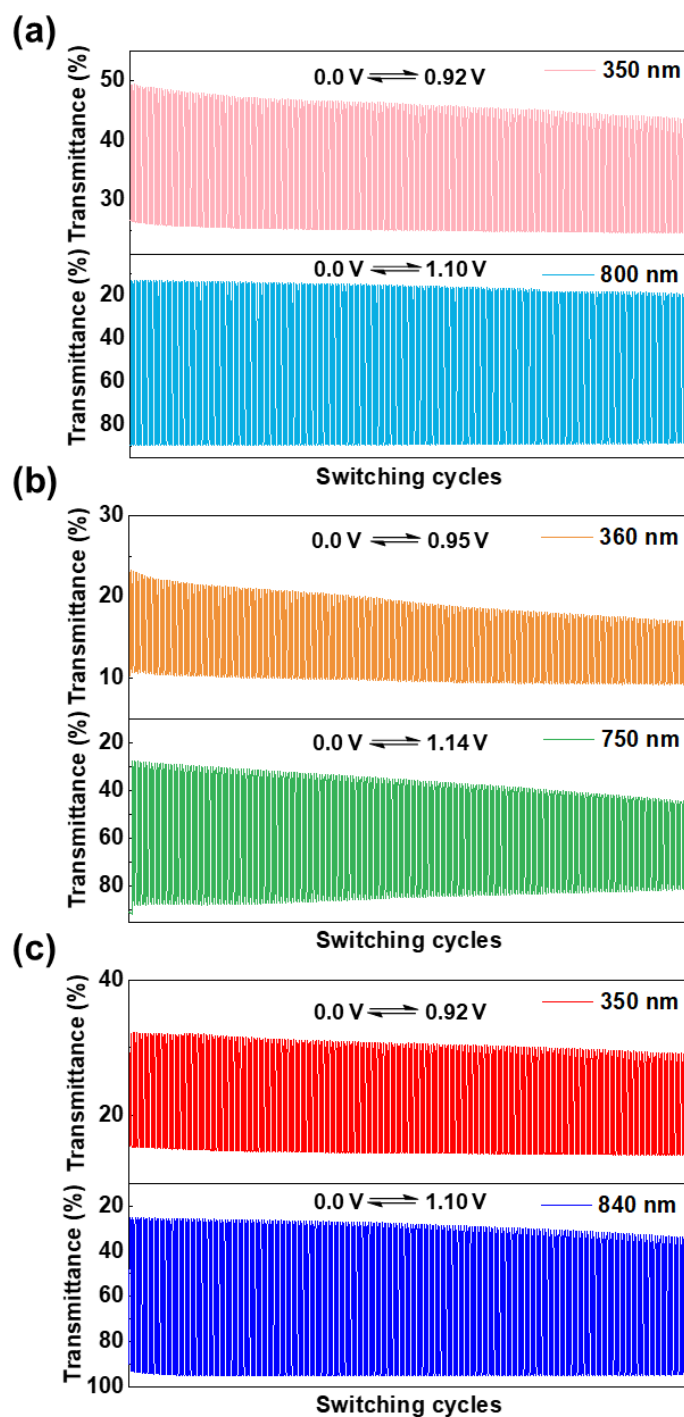

**Fig. S10** Electrochromic switching of the polymer films in PC solution with 100 mM TBAP under square-wave potential sweeps with a pulse time of 10 s for 200 continuous cycles: (a) the optical transmittance of **PCT** film was monitored at 350 and 800 nm, (b) the optical transmittance of **PCTT** film was monitored at 360 and 750



nm, and (c) the optical transmittance of **PCBT** film was monitored at 350 and 840 nm.

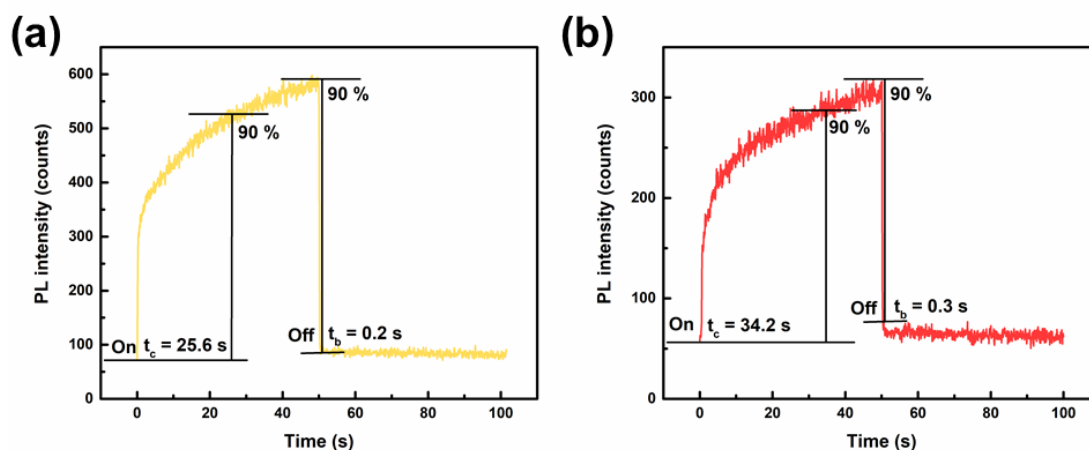

**Fig. S11** Fluorescence spectroelectrochemistry of polymers (a) **PCT**, and (b) **PCBT** in PC containing 100 mM TBAP with applied potentials from 0.0 to 1.1 V versus Ag/AgCl.

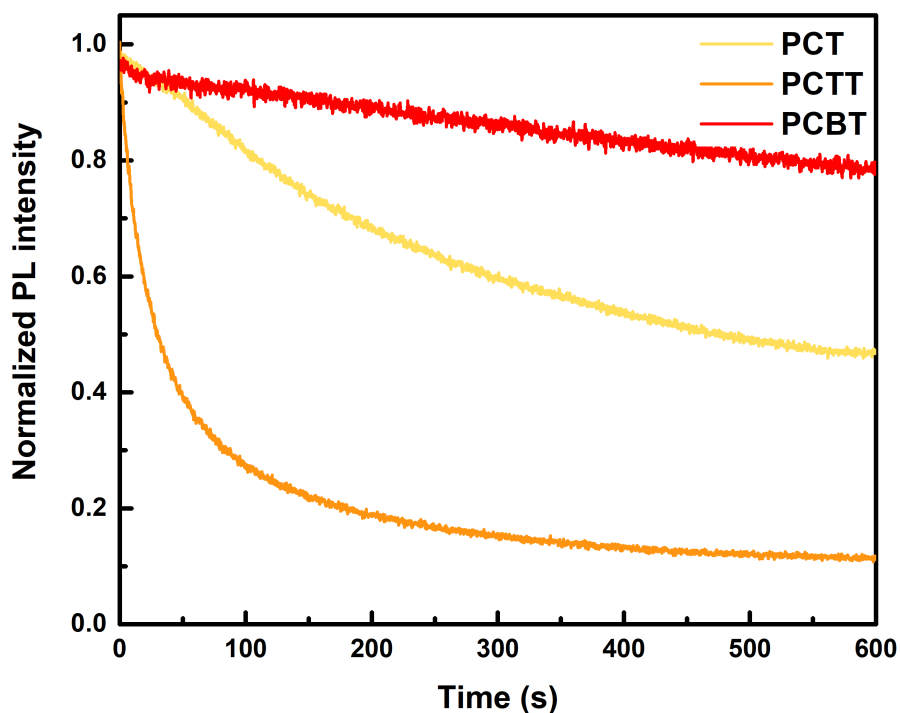

**Fig. S12** The time-dependent fluorescence decay of **PCT**, **PCTT**, and **PCBT** films as exposed to 365 nm UV light for a continuous 10 min.

# $^1\text{H}$ and $^{13}\text{C}$ NMR spectra of new compounds

CT  $^1\text{H}$  NMR ( $\text{CD}_2\text{Cl}_2$ , r.t.);  $^{13}\text{C}$  NMR ( $\text{C}_2\text{D}_2\text{Cl}_4$ , r.t.)

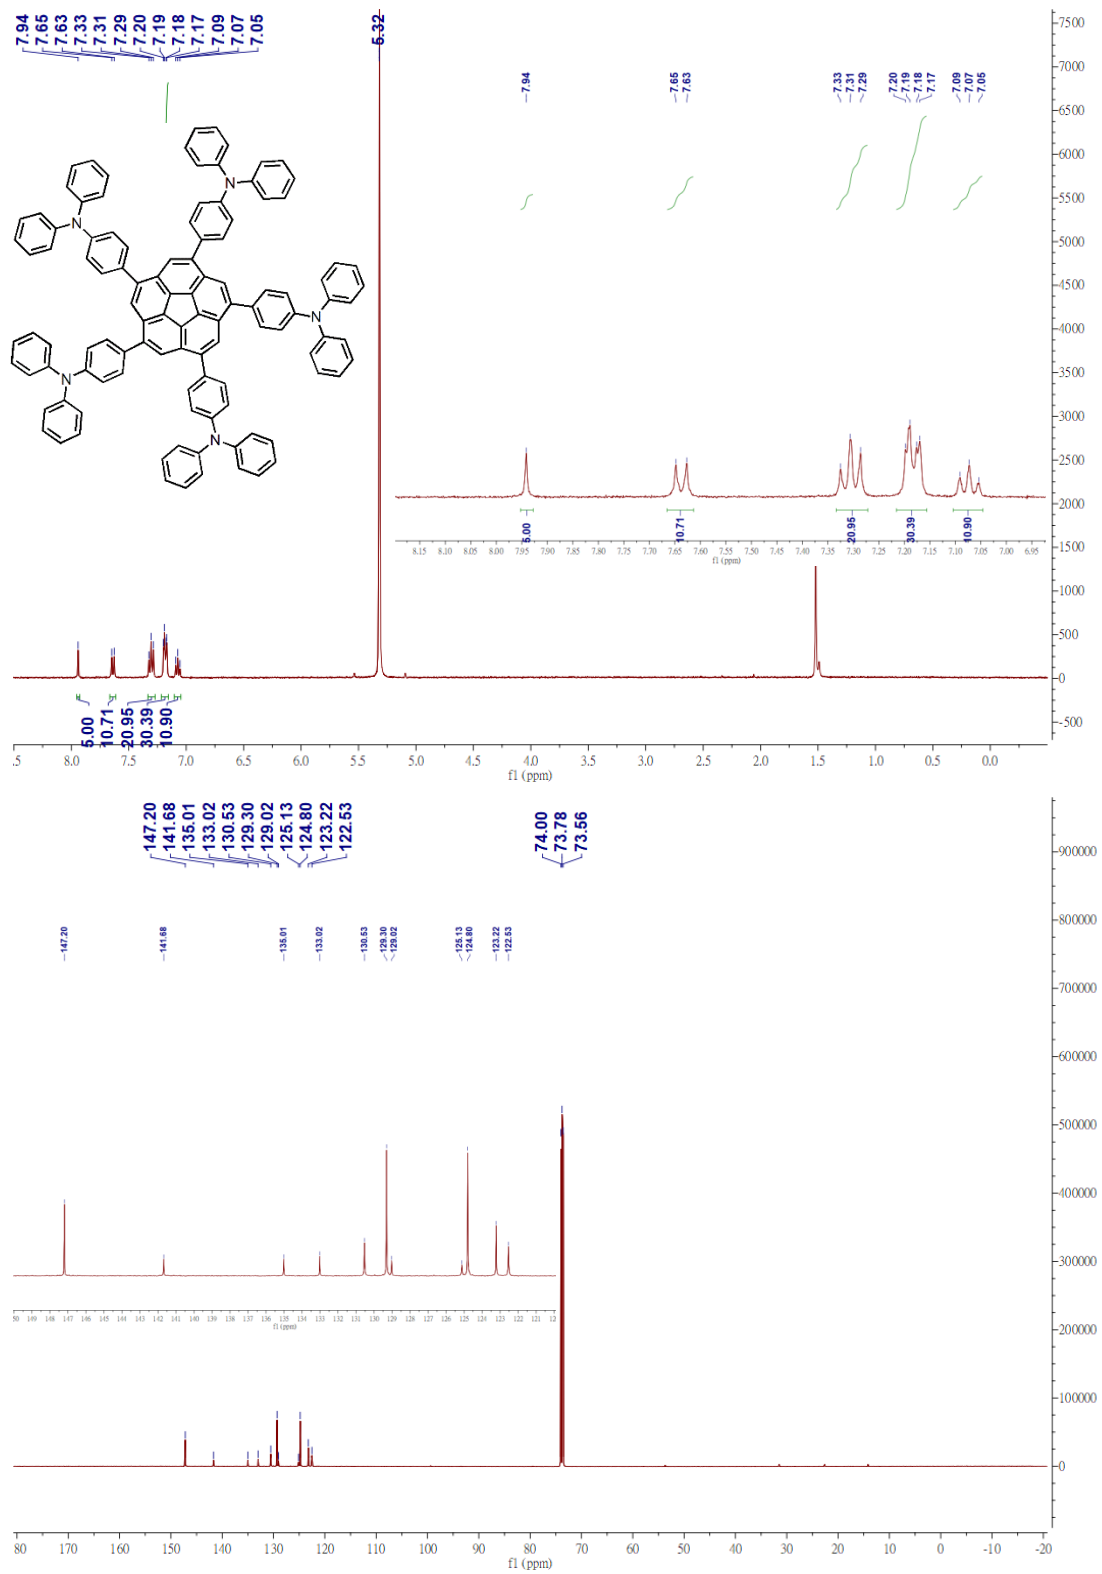

CTT  $^1\text{H}$  NMR ( $\text{C}_2\text{D}_2\text{Cl}_4$ ,  $70^\circ\text{C}$ );  $^{13}\text{C}$  NMR ( $\text{C}_2\text{D}_2\text{Cl}_4$ ,  $70^\circ\text{C}$ )

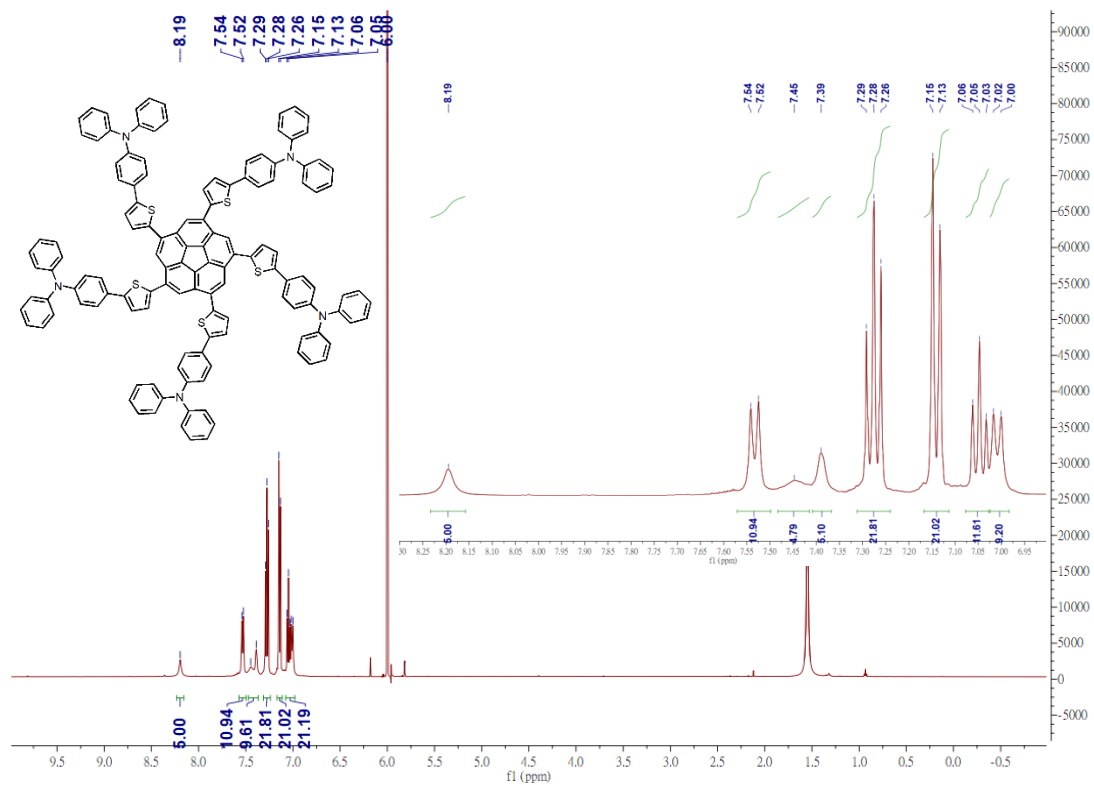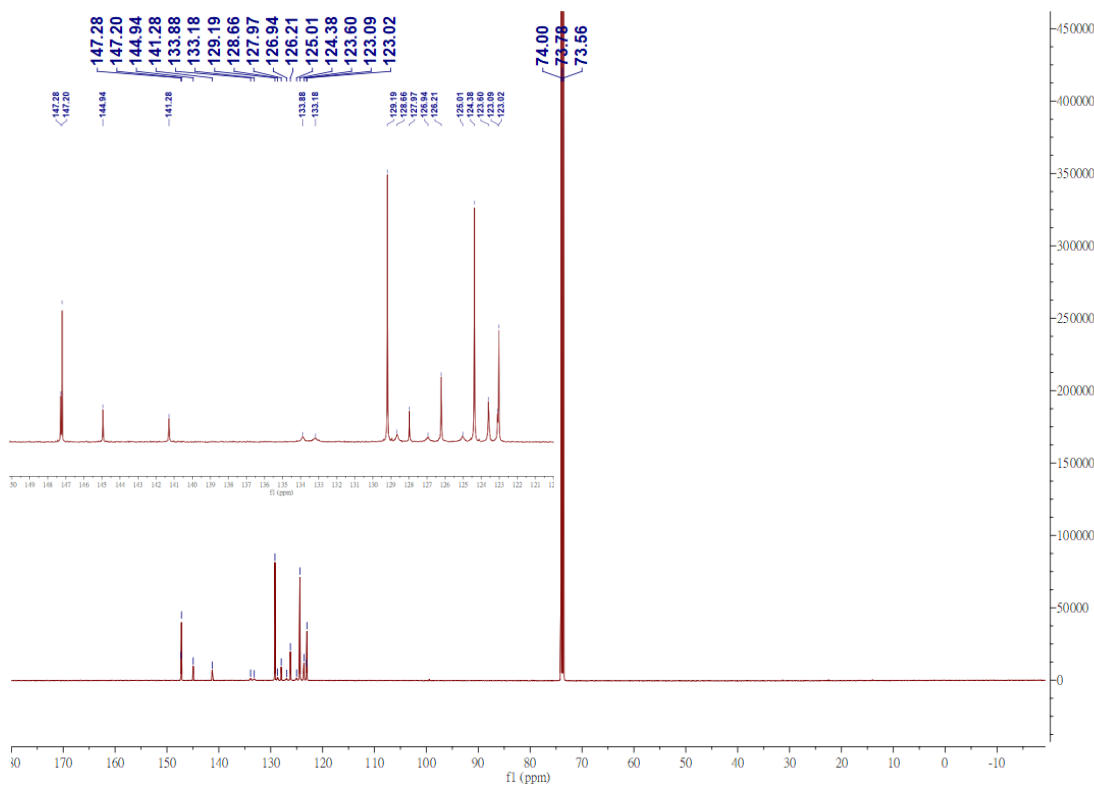

CBT <sup>1</sup>H NMR (C<sub>2</sub>D<sub>2</sub>Cl<sub>4</sub>, 70 °C); <sup>13</sup>C NMR (C<sub>2</sub>D<sub>2</sub>Cl<sub>4</sub>, 70 °C)

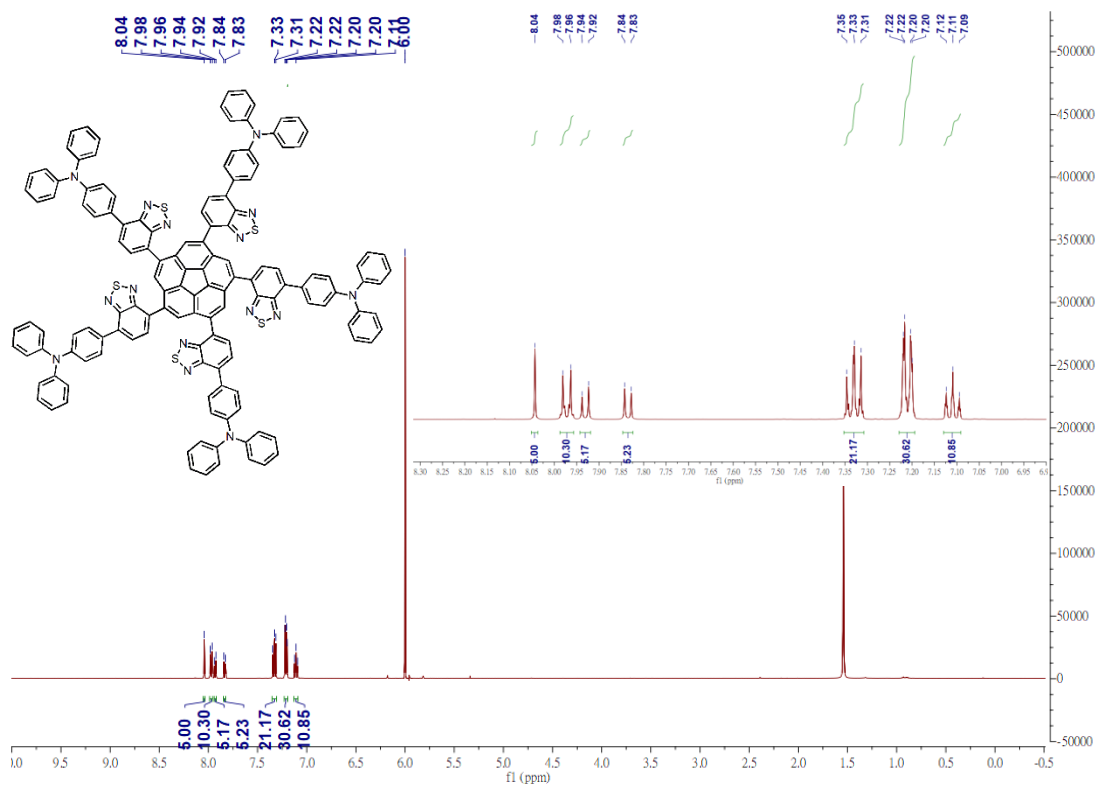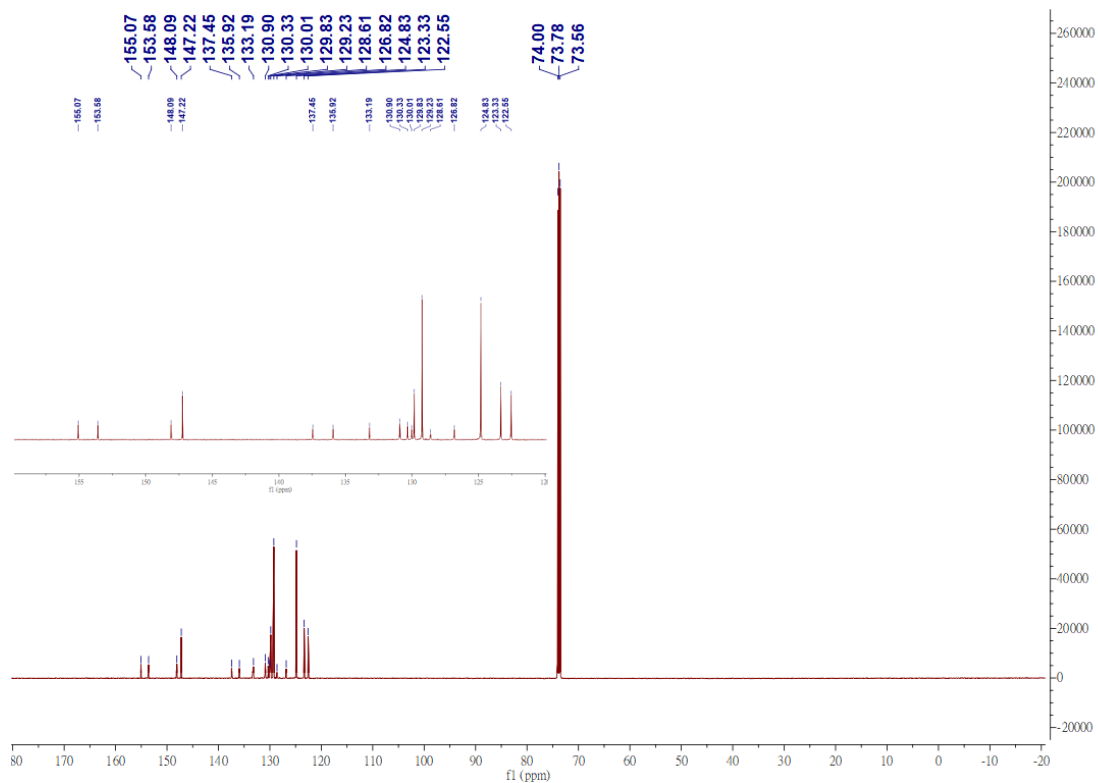

Supplement: d1tc01420j1.pdf [file d1tc01420j1.pdf]
